# Supplementary material
Source: MDPI journal article supplement (https://www.mdpi.com/2073-4441/15/24/4290)
Supplement: s1 [file s1]

# SARS-CoV-2 Wastewater Monitoring in Thuringia, Germany: Analytical Aspects and Normalization of Results

Sarah Haeusser <sup>1,2,\*</sup>, Robert Möller <sup>3</sup>, Kay Smarsly <sup>4</sup>, Yousuf Al-Hakim <sup>4</sup>, Norbert Kreuzinger <sup>5</sup>, Johannes Pinnekamp <sup>6</sup>, Mathias W. Pletz <sup>7</sup>, Claudia Kluemper <sup>1</sup> and Silvio Beier <sup>2</sup>

<sup>1</sup> Department Hamm 2, Hamm-Lippstadt University of Applied Sciences, 59063 Hamm, Germany; claudia.kluemper@hshl.de

<sup>2</sup> Bauhaus-Institute for Infrastructure Solutions (b.is), Bauhaus University Weimar, 99423 Weimar, Germany; silvio.beier@uni-weimar.de

<sup>3</sup> Analytik Jena GmbH + Co. KG, 07745 Jena, Germany; robert.moeller@analytik-jena.com

<sup>4</sup> Institute of Digital and Autonomous Construction, Hamburg University of Technology, 21079 Hamburg, Germany

<sup>5</sup> Institute for Water Quality and Resources Management, Vienna University of Technology, 1040 Vienna, Austria

<sup>6</sup> Institute of Environmental Engineering, RWTH Aachen University, 52074 Aachen, Germany

<sup>7</sup> Institute for Infectious Diseases and Infection Control, Jena University Hospital/Friedrich-Schiller-University, Am Klinikum 1, 07740 Jena, Germany

\* Correspondence: sarah.haeusser@hshl.de

## Supplement

### Supplement

#### a) Boxplots

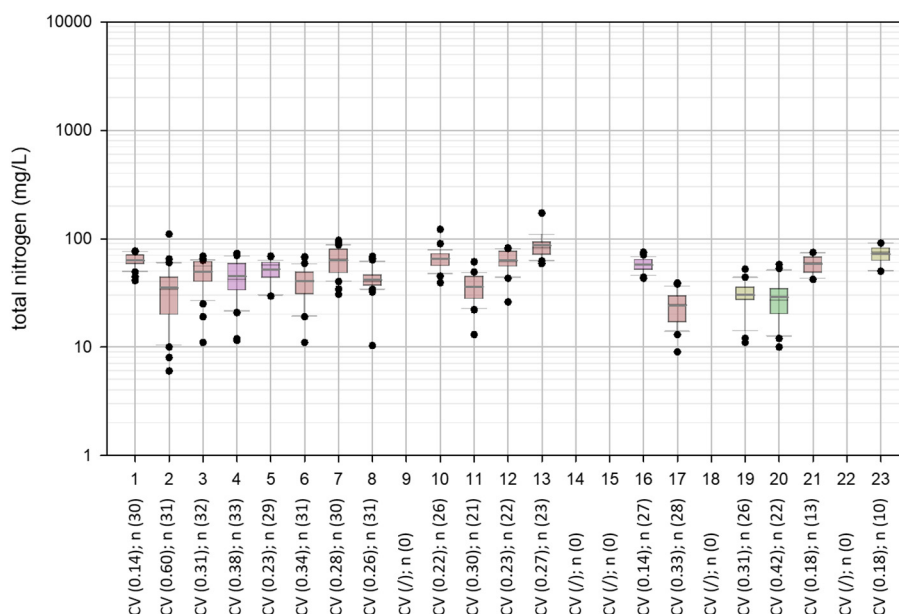

Figure S1: Temporal variation of  $N_{\text{tot}}$  concentration [mg/L] for the 23 different sampling sites with size classes (GK) (violet = GK 5; red = GK 4; yellow = GK 3; green = GK 2). boxplots: median (black line), mean (gray line), 10% and 90% quantiles as whiskers and all possible outliers.

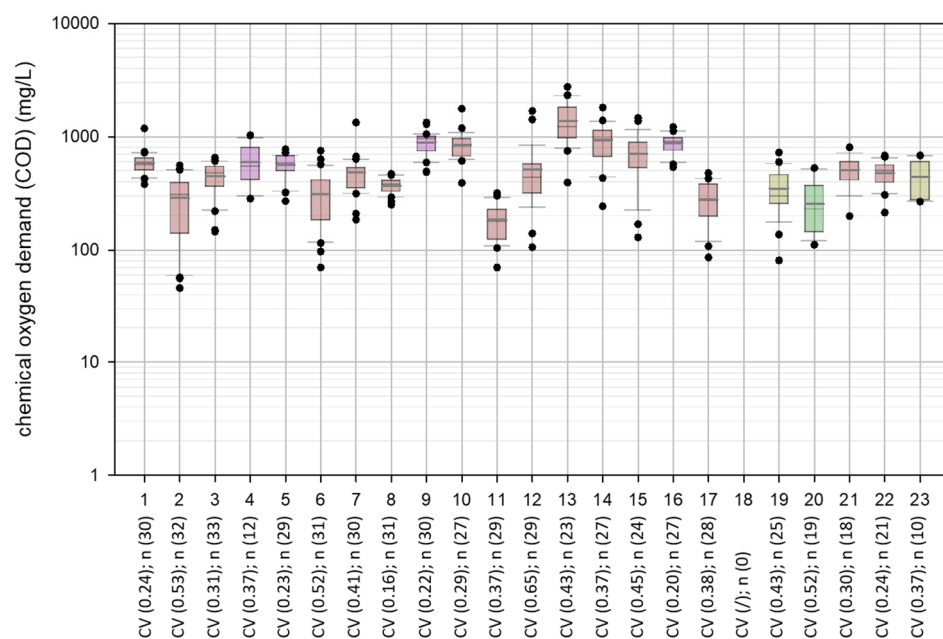

Figure S2: Temporal variation of COD concentration [mg/L] for the 23 different sampling sites with size classes (GK) (violet = GK 5; red = GK 4; yellow = GK 3; green = GK 2). boxplots: median (black line), mean (gray line), 10% and 90% quantiles as whiskers and all possible outliers.

**b) Time course of cumulative average concentration of PMMoV RNA and COD and N<sub>tot</sub> for federal state**

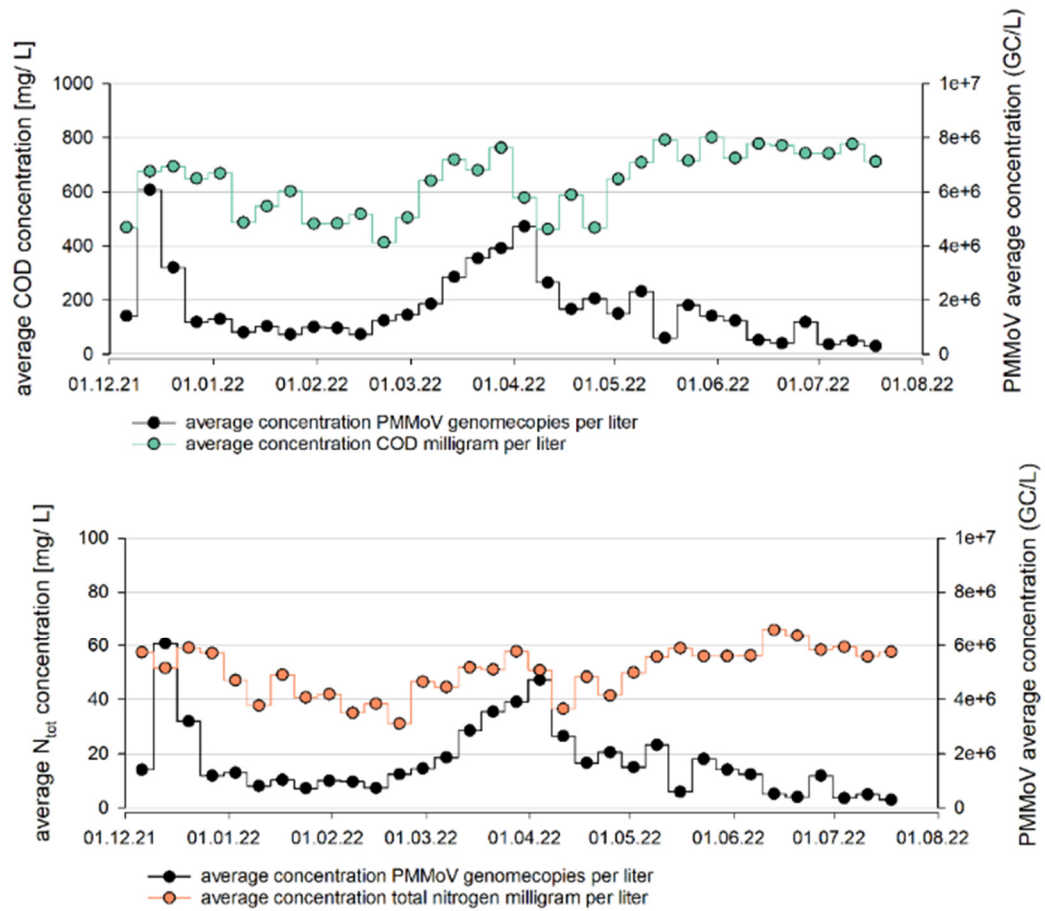

Figure S3: Investigation of seasonal variation. Cumulative mean concentrations (flow-normalized) for total pooled data set of average COD and N<sub>tot</sub> concentration [mg/L] and PMMoV genome copies [GC/L] in comparison.

Table S1: Spearman Correlation between cumulative average concentration of PMMoV, NH<sub>4</sub>-N, COD and N<sub>tot</sub>.  
P-value \*<0.05; \*\*>0.05

| Spearman Correlation                                  | Cumulative<br>concentration<br>NH <sub>4</sub> -N [mg/L] | Cumulative<br>concentration<br>COD [mg/L] | Cumulative<br>concentration<br>N <sub>tot</sub> [mg/L] | Cumulative<br>concentration<br>PMMoV [GC/L] |
|-------------------------------------------------------|----------------------------------------------------------|-------------------------------------------|--------------------------------------------------------|---------------------------------------------|
| Cumulative concentration<br>NH <sub>4</sub> -N [mg/L] | 1                                                        | 0.815*                                    | 0.888*                                                 | -0.168**                                    |
| Cumulative concentration<br>COD [mg/L]                | 0.815*                                                   | 1                                         | 0.807*                                                 | -0.194**                                    |
| Cumulative concentration<br>N <sub>tot</sub> [mg/L]   | 0.888*                                                   | 0.807*                                    | 1                                                      | -0.166**                                    |
| Cumulative concentration<br>PMMoV [GC/L]              | -0.168 **                                                | -0.194**                                  | -0.166**                                               | 1                                           |

c) Time course

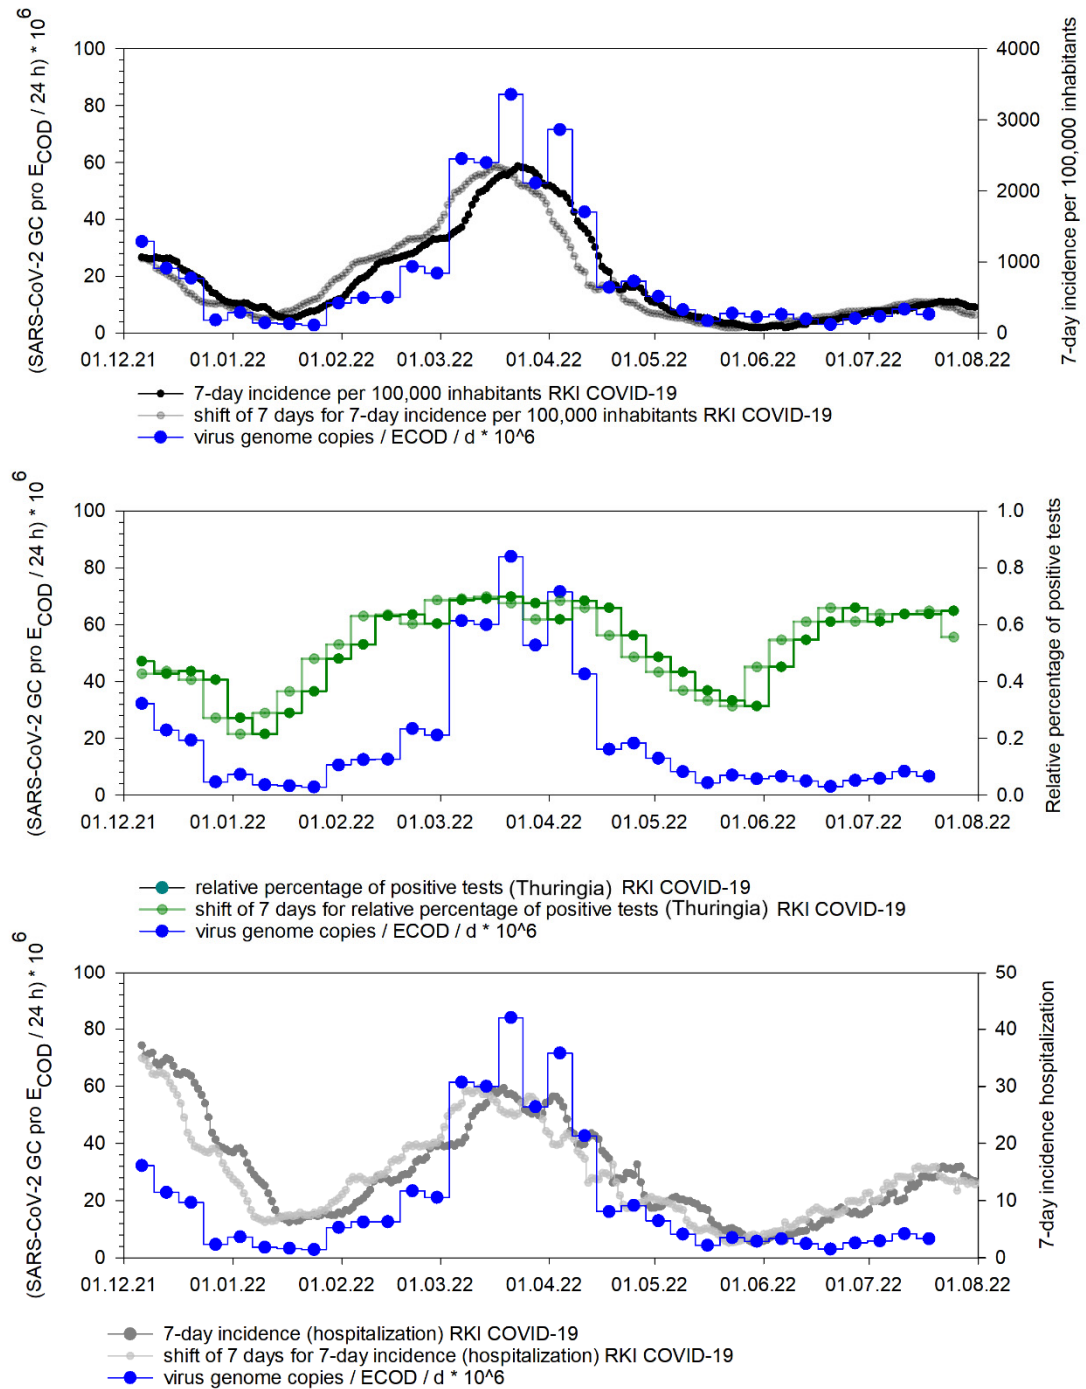

Figure S4: Timeline of SARS-CoV-2 genome copies per inhabitant<sub>COD</sub> / 24 h of all sampled WWTPs (see table 1) and different epidemiological metrics for the Free State of Thuringia - without time shift of epidemiological metrics and a with a time shift.

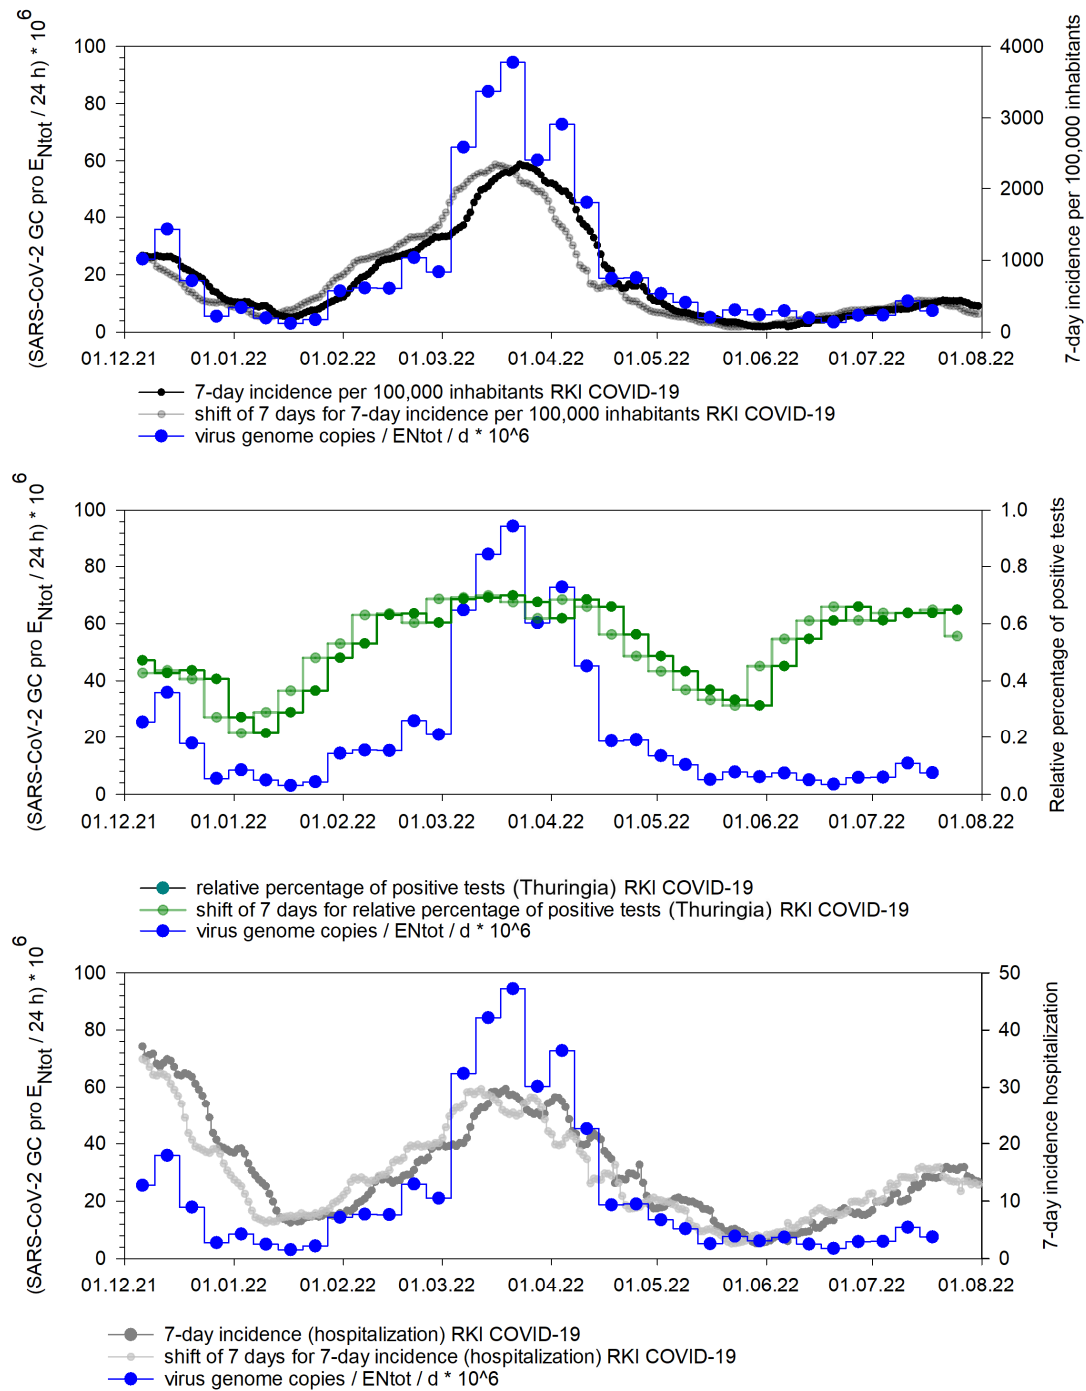

Figure S5: Timeline of SARS-CoV-2 genome copies per inhabitant  $N_{tot} / 24 \text{ h}$  of all sampled WWTPs (see table 1) and different epidemiological metrics for the Free State of Thuringia - without time shift of epidemiological metrics and a with a time shift.

#### d) Quality Control

Table S2: Minimum and maximum coefficients of variation (CVs) of biological and technical replicates for SARS-CoV-2 (N1 assay) and PMMoV.

|                          | CVs for triplicate biological extracts | CVs for triplicate technical replicates |
|--------------------------|----------------------------------------|-----------------------------------------|
| SARS-CoV-2<br>(N1 assay) | MIN: 0.002<br>MAX: 0.76                | MIN: 0.0001<br>MAX: 0.079               |
| PMMoV                    | MIN: 0.015<br>MAX: 1.19                | MIN: 0.0003<br>MAX: 0.035               |

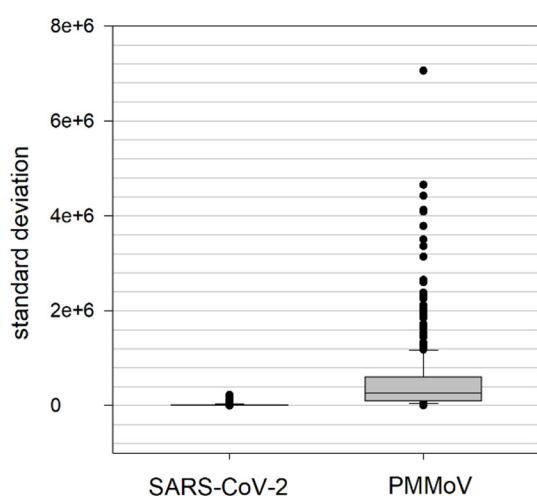

Figure S6: Standard deviation of biological replicates for the concentration [GC/L] of SARS-CoV-2 and PMMoV. boxplots: median (black line), 10% and 90% quantiles as whiskers and all possible outliers.

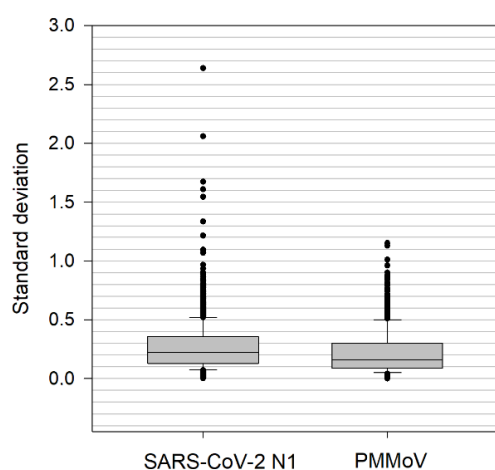

Figure S7: Standard deviation of CT-values from the technical replicates for the SARS-CoV-2 N1 and PMMoV assay in RT-qPCR. boxplots: median (black line), 10% and 90% quantiles as whiskers and all possible outliers.

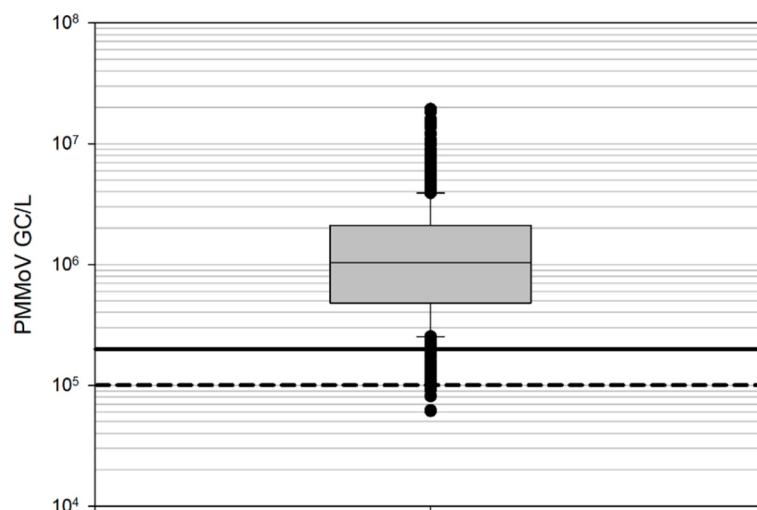

Figure S8: PMMoV as internal extraction control with threshold of  $10^5$  PMMoV GC/L (lower values indicated poor quality; dashed line) and  $2 \times 10^5$  PMMoV GC/L (higher values indicated acceptable quality; line). Threshold values were used in accordance with Kantor et al. (52) . boxplot: median (black line), 10% and 90% quantiles as whiskers and all possible outliers.

### RT-qPCR Performance Characteristics

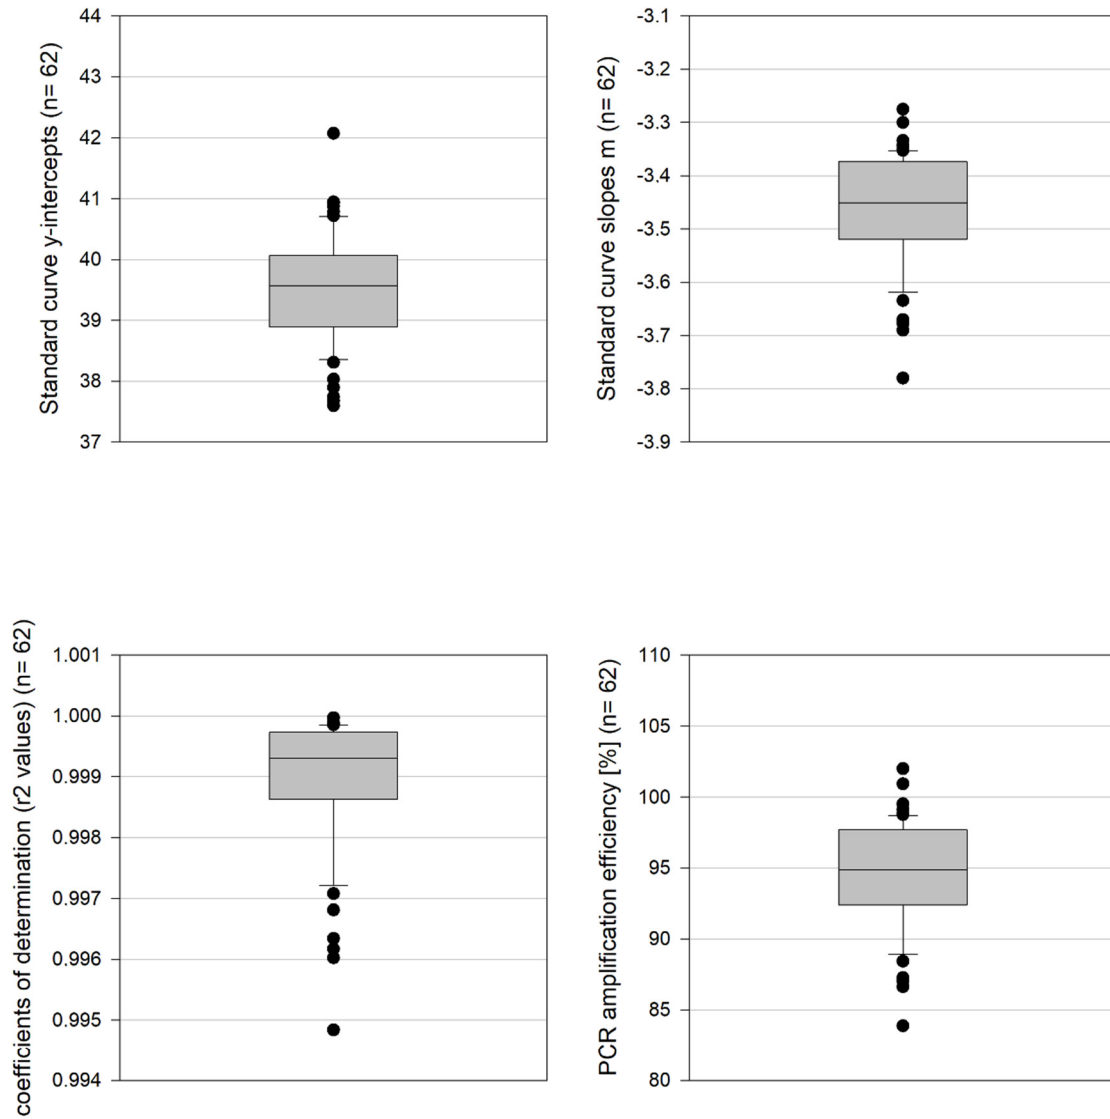

Figure S9: RT-qPCR Performance Characteristics SARS-CoV-2. boxplots: median (black line), 10% and 90% quantiles as whiskers and all possible outliers.

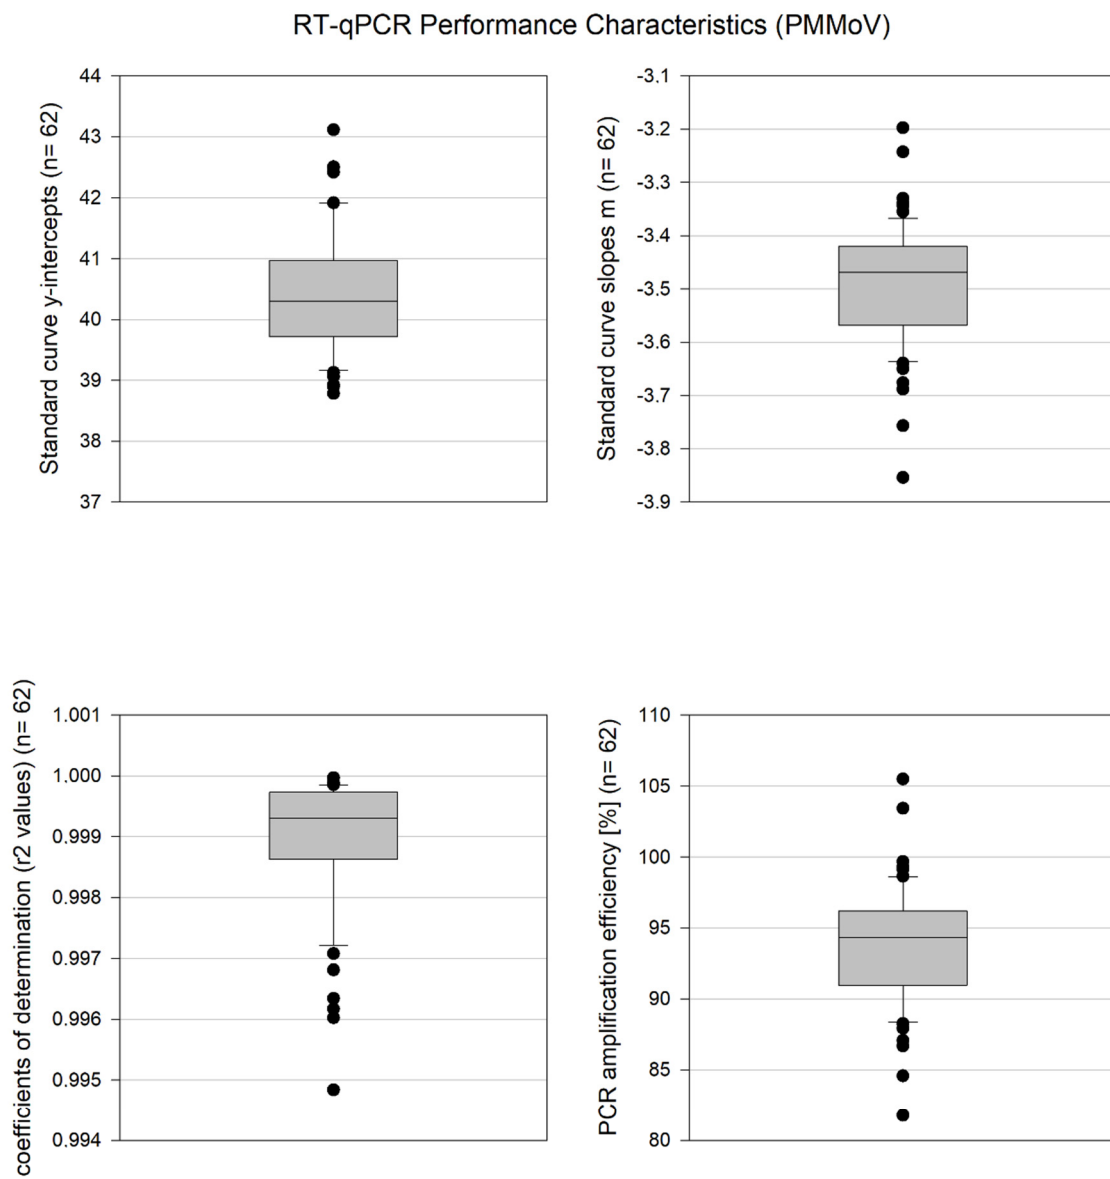

Figure S10: RT-qPCR Performance Characteristics PMMoV. boxplots: median (black line), 10% and 90% quantiles as whiskers and all possible outliers.

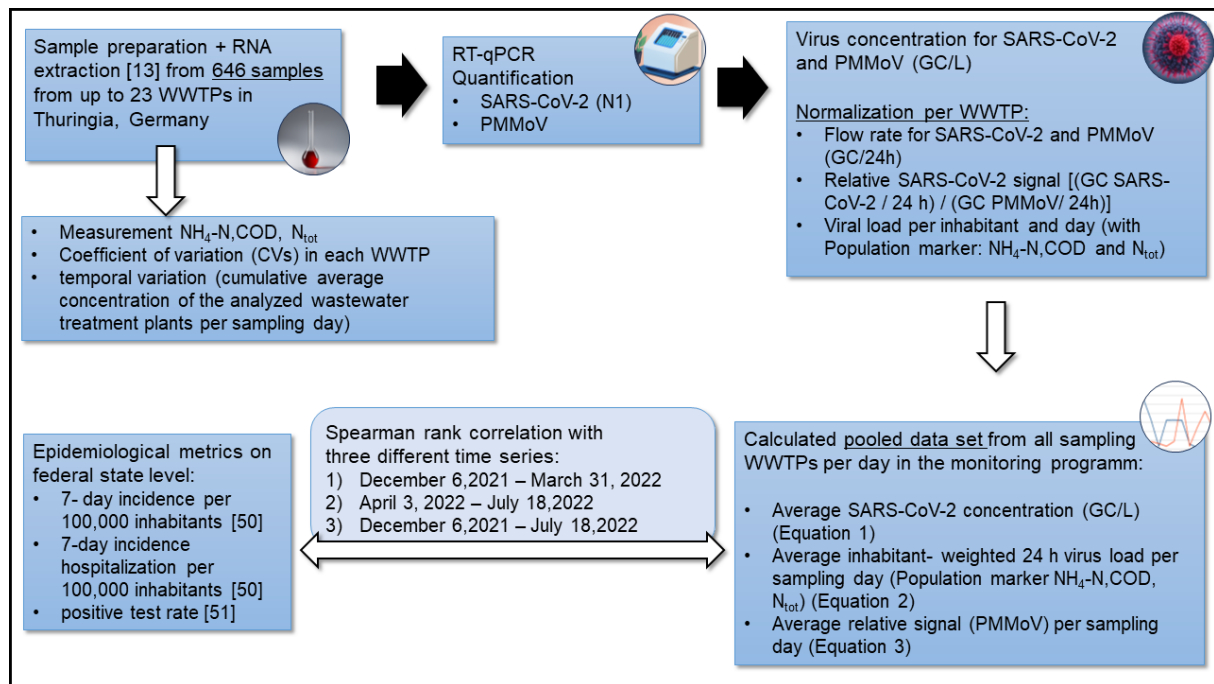

Figure S11: Figure providing an overview of the methods and data analyses performed.

### e) Cost per biological replicate

Table S3: Cost per biological sample replicate for RNA extraction (consumables and reagents) within the comparative analyses in the wastewater monitoring laboratory at Hamm Lippstadt University of Applied Sciences.

| Items                                                                                      | Metric                 | Amount used per wastewater sample biological replicate | Cost per sample replicate [€] |
|--------------------------------------------------------------------------------------------|------------------------|--------------------------------------------------------|-------------------------------|
| <b><u>Lysis</u></b>                                                                        |                        |                                                        | <b><u>0.37</u></b>            |
| NaCl (≥99 %, Ph. Eur., USP, Carl Roth GmbH + Co. KG, Karlsruhe, Germany)                   | kg                     | 0.01                                                   |                               |
| 50 mL conical tubes (Eppendorf SE, Hamburg, Germany)                                       | tube                   | 1                                                      |                               |
| Tris (reagent grade) (Carl Roth GmbH + Co. KG, Karlsruhe, Germany)                         | kg                     | 0.00007                                                |                               |
| EDTA, Disodium ACS Reagent Grade (Carl Roth GmbH + Co. KG, Karlsruhe, Germany)             | g                      | 0.012                                                  |                               |
| 1000uL pipette tips with filter (Socorex Isba SA, Ecublens, Switzerland)                   | tips                   | 1                                                      |                               |
| <b><u>Prefiltration</u></b>                                                                |                        |                                                        | <b><u>3.08</u></b>            |
| PVDF flat membrane filters; 5 µm; 47mm (Durapore®, Merck KGaA, Darmstadt, Germany)         | filters                | 1                                                      |                               |
| 50 mL syringe (sterile) (Carl Roth GmbH + Co. KG, Karlsruhe, Germany)                      | syringes               | 1                                                      |                               |
| <b><u>RNA extraction</u></b>                                                               |                        |                                                        | <b><u>10.62</u></b>           |
| Ethanol (70%) from Ethanol 99.8% p.a                                                       | L                      | 0.04                                                   |                               |
| Ethanol (99.8% p.a) (Carl Roth GmbH + Co. KG, Karlsruhe, Germany)                          | L                      | 0.009                                                  |                               |
| Wash Buffer 1                                                                              | L                      | 0.005                                                  |                               |
| Wash Buffer 2                                                                              | L                      | 0.01                                                   |                               |
| ZymoPURE Elution Buffer (ZYMO Research Europe GmbH, Freiburg, Germany).                    | mL                     | 0.2                                                    |                               |
| Zymo IIP columns with reservoir (ZYMO Research Europe GmbH, Freiburg, Germany).            | columns and reservoirs | 1                                                      |                               |
| 200uL pipette tips with filter (Socorex Isba SA, Ecublens, Switzerland)                    | tips                   | 3                                                      |                               |
| 120 ml sterile cups (Carl Roth GmbH + Co. KG, Karlsruhe, Germany)                          | cup                    | 1                                                      |                               |
| 2,0 mL tubes (Eppendorf SE, Hamburg, Germany)                                              | tubes                  | 1                                                      |                               |
| 1.5 mL tubes (Eppendorf SE, Hamburg, Germany)                                              | tubes                  | 2                                                      |                               |
| <b><u>Cost per biological sample replicate (Sample preparation and RNA extraction)</u></b> |                        |                                                        | <b><u>14.07</u></b>           |
| <b><u>*One-time cost</u></b>                                                               |                        |                                                        |                               |
| EZ-Vac Vacuum Manifold (ZYMO Research Europe GmbH, Freiburg, Germany).                     |                        |                                                        | <b><u>226</u></b>             |
